# Supplementary material
Source: PubMed Central journal article supplement (PMC4106653)
Supplement: ajcr0004-0353-f4.pdf [file ajcr0004-0353-f4.pdf]

## Androgen receptor and breast cancers

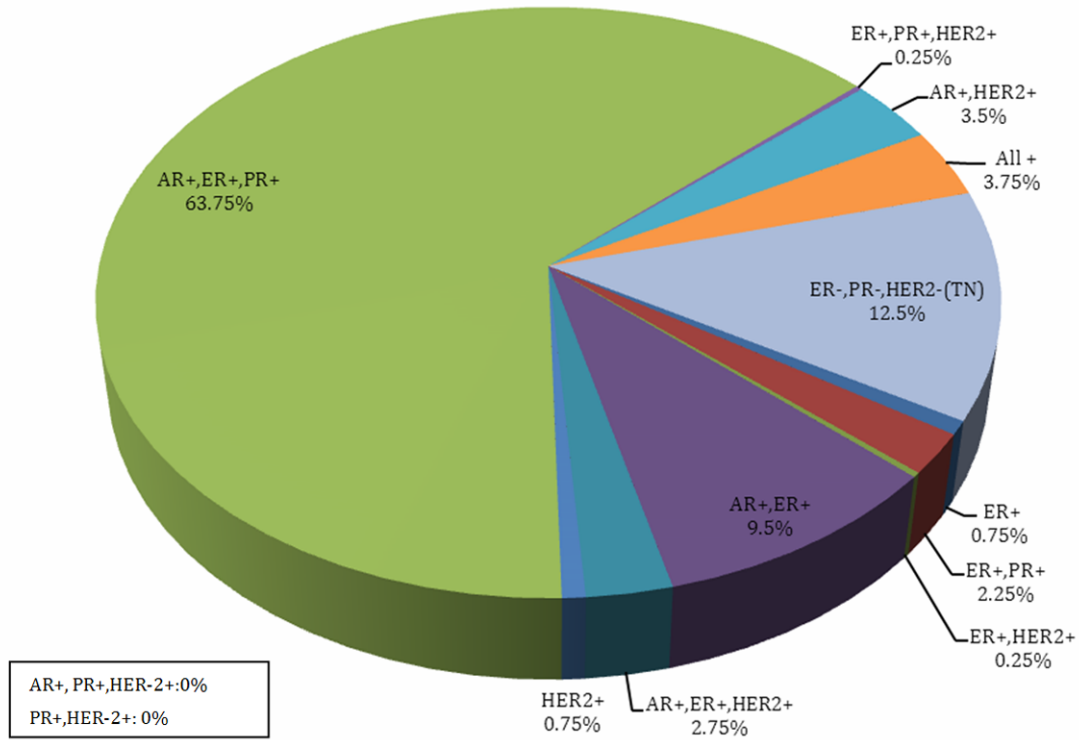

|               | ER+             | PR+                   | AR+              | HER-2+             | ALL+(QP)    |
|---------------|-----------------|-----------------------|------------------|--------------------|-------------|
|               | 0.75%           | 0.25%                 | 4.5%             | 0.75%              | 3.75%       |
| ER+, PR+      | ER+, AR+        | ER+, PR+              | AR+, HER-2+      | ER+, HER-2+        | PR+, HER-2+ |
| 2.25%         | 9.5%            | 2.25%                 | 3.5%             | 0.25%              | 0%          |
| AR+, PR+, ER+ | AR+, ER+, HER2+ | ER+, PR+, HER-2+ (TP) | AR+, PR+, HER-2+ | AR-, ER-, PR- (TN) | ALL- (QN)   |
| 63.75%        | 2.75%           | 0.25%                 | 0%               | 12.5%              | 8%          |

**Supplementary Chart 1.** Percentage of different biomarker combinations among the 400 breast cancers.

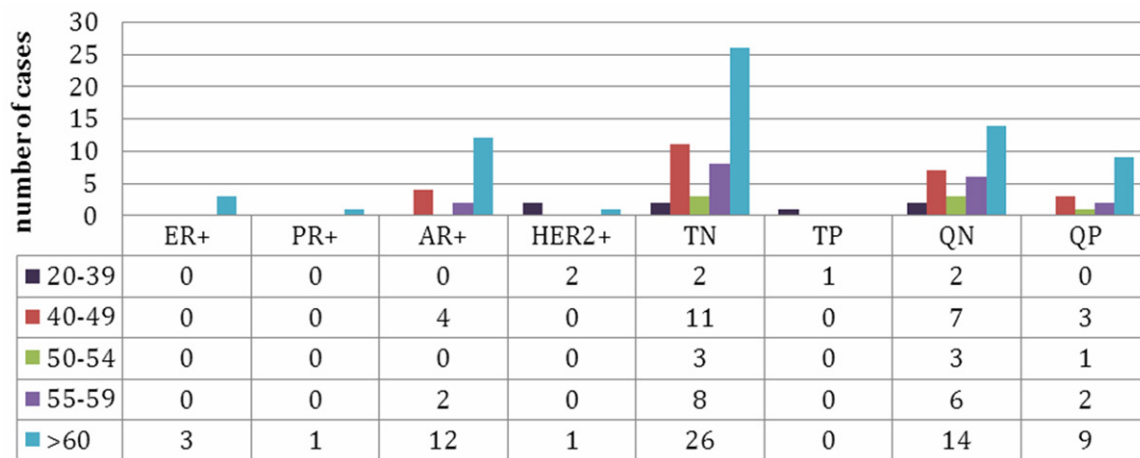

**Supplementary Figure 1.** Age distribution of different types of breast cancer according to marker expression.
